# Supplementary material for: Transposon-mediated generation of BCR-ABL1-expressing transgenic cell lines for unbiased sensitivity testing of tyrosine kinase inhibitors
Source: PubMed Central journal article supplement (PMC5363645; doi:10.18632/oncotarget.12943), 2016-10-27
Supplement: oncotarget-07-78083-s001.pdf [file oncotarget-07-78083-s001.pdf]

## Transposon-mediated generation of *BCR-ABL1*-expressing transgenic cell lines for unbiased sensitivity testing of tyrosine kinase inhibitors

### SUPPLEMENTARY FIGURES AND TABLES

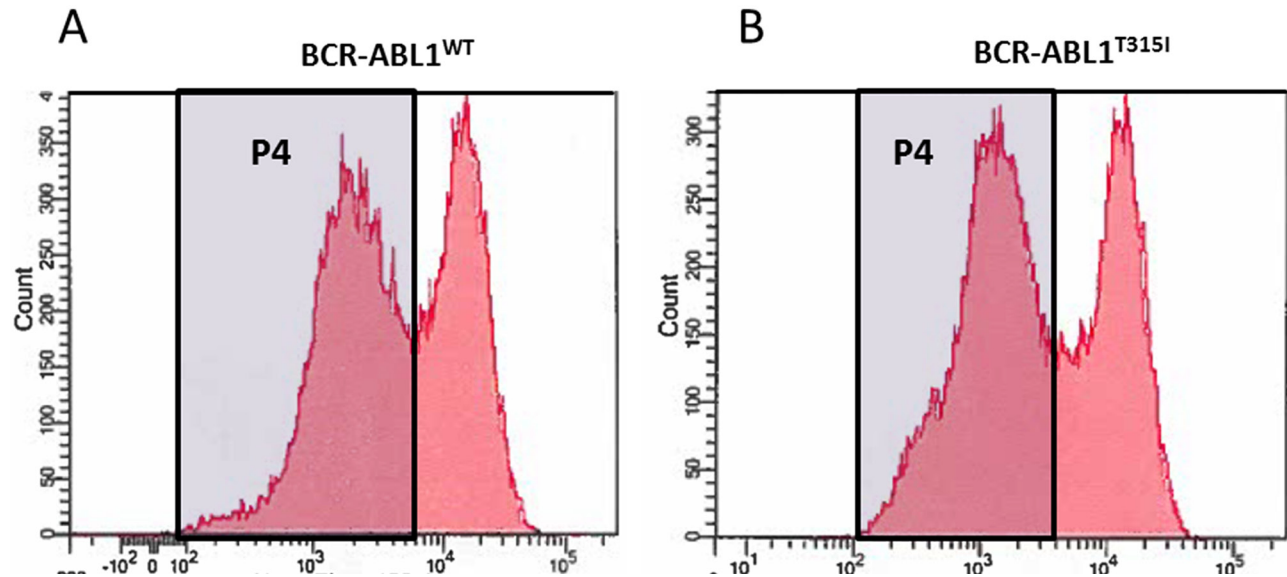

**Supplementary Figure S1: Flow-sorting of LV-transduced Ba/F3-BCR-ABL1 cells.** Histogram showing two representative examples of LV-transduced Ba/F3-BCR-ABL1 cells. Both cell lines displayed reveal double peaks reflecting various cell populations with multiple inserts, as documented by FISH (Supplementary Table S2). The gate for sorting was set as indicated by grey squares. Flow-sorting yielded cell populations with reduced *BCR-ABL1* genomic insertions, as documented by FISH and qPCR analyses.

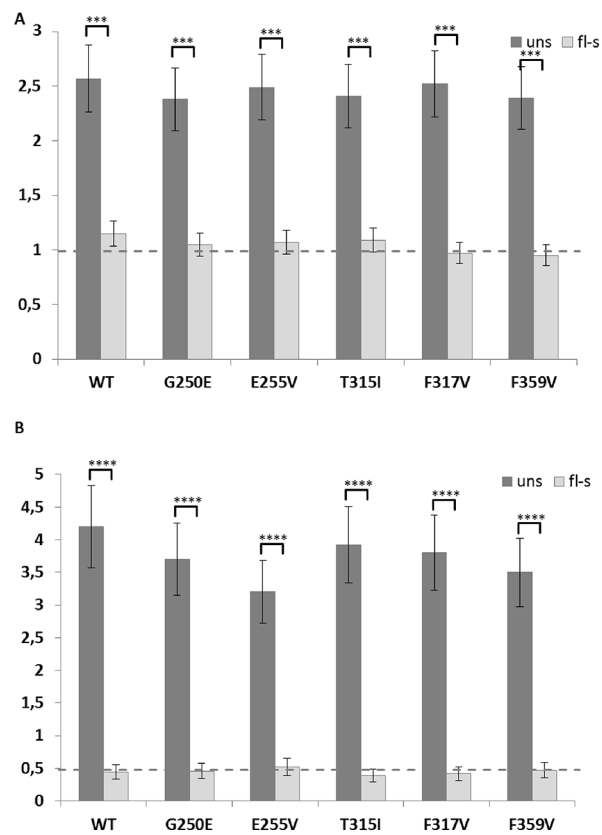

**Supplementary Figure S2: Real-time PCR and *BCR-ABL1* expression analysis.** Panel A. shows the copy number of *BCR-ABL1* inserts in the diploid genome of LV-transduced Ba/F3 cells before (dark grey bars) and after (light grey bars) flow-sorting. Panel B. shows the relative expression levels of *BCR-ABL1* before (dark grey bars) and after (light grey bars) sorting. The dashed horizontal line highlights the average of one *BCR-ABL1* construct insertion per diploid genome in flow-sorted cells (Panel A), and the uniform *BCR-ABL1* mRNA expression level in flow-sorted cells (panel B). uns, unselected; fl-s, flow-sorted.

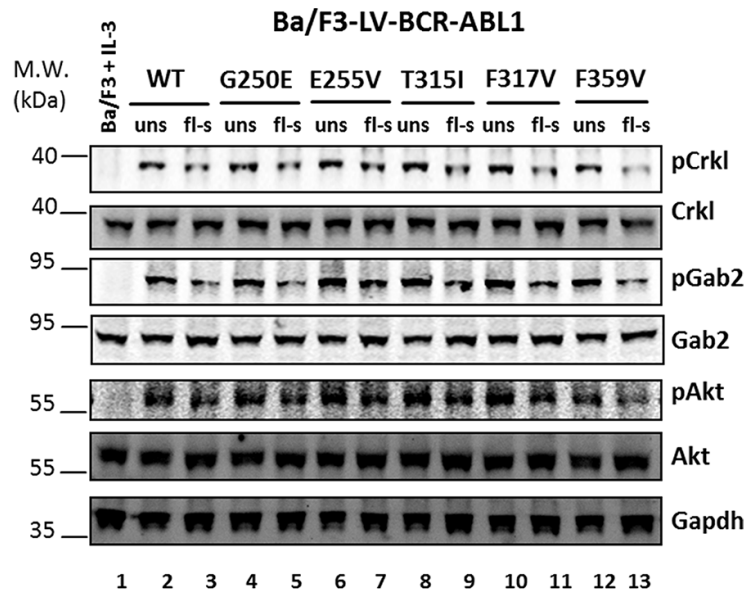

**Supplementary Figure S3: Western blot analysis of unselected and flow-sorted LV-transduced Ba/F3-BCR-ABL1 cells.** Cell lysates were prepared from the parental Ba/F3 cells (growing in the presence of IL-3) (lane 1) and Ba/F3 cells bearing different *BCR-ABL1* constructs before and after flow-sorting, as indicated in Supplementary Figure S1. The cell lysates were probed against different antibodies targeting the proteins indicated on the right. WT, wildtype; uns, unselected cells; fl-s, flow-sorted cells.

**Supplementary Table S1: Primer sequences employed in cloning**

| <b>Primer designation</b> | <b>Sequence</b>                              |
|---------------------------|----------------------------------------------|
| BCR_pITR_FW               | ACCCCAAGCTGGCCTATGGTGGACCCGGTGGC             |
| ABL_pITR_RV               | ATGGAAGCTTGGCCTCTACCTCTGCACTATGTCACTGATTCCTT |
| G250E_s                   | CACAAGCTGGGCGAGGGCCAGTACGG                   |
| G250E_as                  | CCGTA CTGGCCCTCGCCCAGCTTGTG                  |
| E255V_s                   | GCCAGTACGGGGTGGTGTACGAGGG                    |
| E255V_as                  | CCCTCGTACACCACCCGTA CTGGC                    |
| T315I_s                   | GCCCCGTTCTATATCATCATTGAGTTCATGACC            |
| T315I_as                  | GGTCATGAACTCAATGATGATATAGAACGGGGGC           |
| F317L_s                   | CCCGTTCTATATCATCACTGAGTTAATGACCTACGGGAAC     |
| F317L_as                  | GTTCCCGTAGGTCATTA ACTCAGTGATGATATAGAACGGG    |
| F359V_s                   | GATCTCTGTGGATGACGTTTTTCTTCTCCAGGTACTC        |
| F359V_as                  | GAGTACCTGGAGAAGAAAAACGTCATCCACAGAGATC        |

Supplementary Table S2: FISH analysis of the transformed Ba/F3 cells

| BCR-ABL1 construct | FISH signals unselected |     | FISH signals flow-sort |    |
|--------------------|-------------------------|-----|------------------------|----|
|                    | 1                       | >1  | 1                      | >1 |
| SB-WT              | 33%                     | 67% | 92%                    | 8% |
| SB-T315I           | 92%                     | 8%  | 96%                    | 4% |
| SB-F317L           | 90%                     | 10% | 97%                    | 3% |
| SB-F359V           | 95%                     | 5%  | 96%                    | 4% |
| LV-WT              | 40%                     | 60% | 97%                    | 3% |
| LV-T315I           | 43%                     | 57% | 96%                    | 4% |
| LV-F317V           | 42%                     | 68% | 96%                    | 4% |
| LV-F359V           | 45%                     | 55% | 98%                    | 2% |

Number of genomic insertions of *BCR-ABL1* constructs documented by FISH signals in unselected and low-fluorescent flow-sorted Ba/F3 cells carrying wildtype (WT) or different mutant *BCR-ABL1* constructs introduced by the Sleeping Beauty transposon (SB)- or lentiviral (LV) -mediated transfer.

Supplementary Table S3: Analysis of in vitro response to different tyrosine kinase inhibitors

| IC <sub>50</sub> values of unselected and flow-sorted Ba/F3-LV-BCR-ABL1 (nM) |                |            |             |
|------------------------------------------------------------------------------|----------------|------------|-------------|
| BCR-ABL1 variant                                                             | Nilotinib      | Dasatinib  | Ponatinib   |
| WT unselected                                                                | 55.0 ± 13.0    | 3.7 ± 1.1  | 4.5 ± 1.5   |
| WT flow-sorted                                                               | 15.0 ± 4.0     | 0.7 ± 0.2  | 1.2 ± 0.2   |
| <i>p-value</i>                                                               | ≤0.001         | ≤0.05      | ≤0.05       |
| G250E unselected                                                             | 105.0 ± 15.0   | 12.0 ± 2.0 | 42.0 ± 8.0  |
| G250E flow-sorted                                                            | 45.0 ± 10.0    | 5.0 ± 1.0  | 8.5 ± 2.0   |
| <i>p-value</i>                                                               | ≤0.001         | ≤0.001     | ≤0.05       |
| E255V unselected                                                             | 2500.0 ± 200.0 | 25.0 ± 3.0 | 65.0 ± 14.0 |
| E255V flow-sorted                                                            | 940.0 ± 120.0  | 10.0 ± 1.0 | 18.0 ± 3.0  |
| <i>p-value</i>                                                               | ≤0.001         | ≤0.001     | ≤0.001      |
| T315I unselected                                                             | 9200 ± 1700    | >10000     | 40.0 ± 8.0  |
| T315I flow-sorted                                                            | 8000 ± 1500    | >10000     | 15.0 ± 3.5  |
| <i>p-value</i>                                                               | ≤0.1           | NA         | ≤0.001      |
| F359V unselected                                                             | 150.0 ± 25.0   | 9.0 ± 2.0  | 24.0 ± 6.0  |
| F359V flow-sorted                                                            | 67.0 ± 12.0    | 3.5 ± 1.0  | 6.5 ± 1.5   |
| <i>p-value</i>                                                               | ≤0.001         | ≤0.001     | ≤0.001      |
| F317V unselected                                                             | 120.0 ± 30.0   | 250.0 ± 40 | 25.0 ± 6.0  |
| F317V flow-sorted                                                            | 35.0 ± 7.0     | 140.0 ± 20 | 12.0 ± 3.0  |
| <i>p-value</i>                                                               | ≤0.001         | ≤0.001     | ≤0.001      |

The indicated IC<sub>50</sub> values were determined in unselected and low-fluorescent flow-sorted Ba/F3 cells carrying wildtype or different mutant *BCR-ABL1* constructs introduced by lentivirus(LV)-mediated transfer. NA, not applicable

Supplementary Table S4: FISH analysis of the unselected cells upon prolonged cultivation

| BCR-ABL1 construct | FISH signals unselected Week 1 |     | FISH signals unselected Week 4 |     |
|--------------------|--------------------------------|-----|--------------------------------|-----|
|                    | 1                              | >1  | 1                              | >1  |
| SB-T315I           | 33%                            | 67% | 2%                             | 98% |
| SB-F317L           | 90%                            | 10% | 25%                            | 75% |

Number of *BCR-ABL1* construct genomic insertions documented by FISH signals in unselected Ba/F3 cells upon cultivation for four weeks.
